# Supplementary material for: Specific Activation of an I-Like Element in Drosophila Interspecific Hybrids
Source: PubMed Central journal article supplement — Genome Biol Evol. 2014 Jun 24;6(7):1806–17. doi: 10.1093/gbe/evu141 (PMC4122939; doi:10.1093/gbe/evu141), 2014-06-24
Supplement: supp_evu141_Supplementary_Material.pdf [file supp_evu141_Supplementary_Material.pdf]

# 1 Supplementary Material

2 **Supplementary Table 1.** Individuals analyzed by Transposon display. All the individuals that are  
 3 presented in this table were analyzed by transposon display, according to Supplementary Figure 1  
 4 (n=86).

| Parental crosses                                    | F1 Analyzed offspring                                    | F1 crosses                    | F2 Analyzed offspring |
|-----------------------------------------------------|----------------------------------------------------------|-------------------------------|-----------------------|
| ♀ 129F X ♂ P129<br><i>D.mojavensis X D.arizonae</i> | F129♂1<br>F129♂2<br>F129♂4<br>F129♂5                     |                               |                       |
|                                                     | F129♀A<br>F129♀C<br>F129♀J<br>F129♀L<br>F129♀O<br>F129♀R | F129♀A X ♂ <i>D. arizonae</i> | 5 ♀ and 3 ♂           |
|                                                     |                                                          | F129♀J X ♂ <i>D. arizonae</i> | 4 ♀ and 5 ♂           |
|                                                     |                                                          | F129♀L X ♂ <i>D. arizonae</i> | 5 ♀ and 5 ♂           |
|                                                     |                                                          | F129♀O X ♂ <i>D. arizonae</i> | 5 ♀ and 5 ♂           |
|                                                     |                                                          | F129♀R X ♂ <i>D. arizonae</i> | 4 ♀ and 3 ♂           |
| ♀ 149F X ♂ P149<br><i>D.mojavensis X D.arizonae</i> | F149♂1<br>F149♂2<br>F149♂4                               |                               |                       |
|                                                     | F149♀A<br>F149♀B<br>F149♀C<br>F149♀D<br>F149♀E           |                               |                       |
|                                                     |                                                          | F149♀B X ♂ <i>D. arizonae</i> | 3 ♀ and 4 ♂           |
|                                                     |                                                          | F149♀E X ♂ <i>D. arizonae</i> | 4 ♀ and 2 ♂           |

5  
6

7

8

9

10

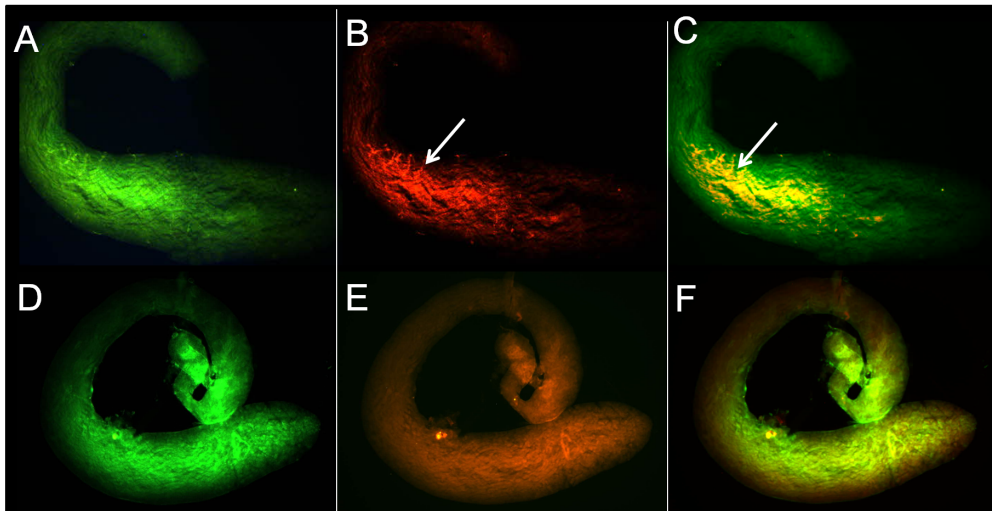

11

12

13

14 **Supplementary Fig. S1.** Immunofluorescence for the Cyclin B mRNA (DNA in green, RNA  
15 in red) in testes of *D. mojavensis*. A-C cyclinB mRNA; D-F negative control (tissues without  
16 anti-DIG treatment). In A and D: DNA was labeled by SYTOX Green Nucleic Acid Stain; B  
17 and D: *cyclinB* mRNA probe; C and F: merge image (DNA plus RNA).

18

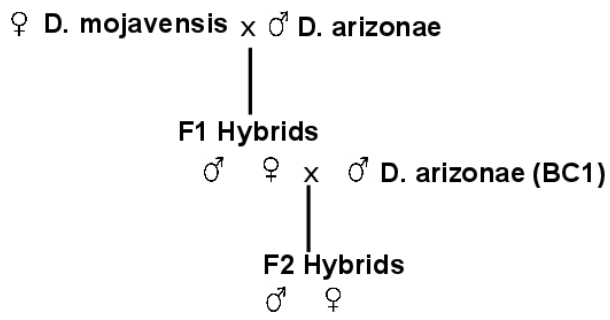

19  
20 **Supplementary Fig. S2.** Transposon Display cross diagram.

21

22

23

24

25

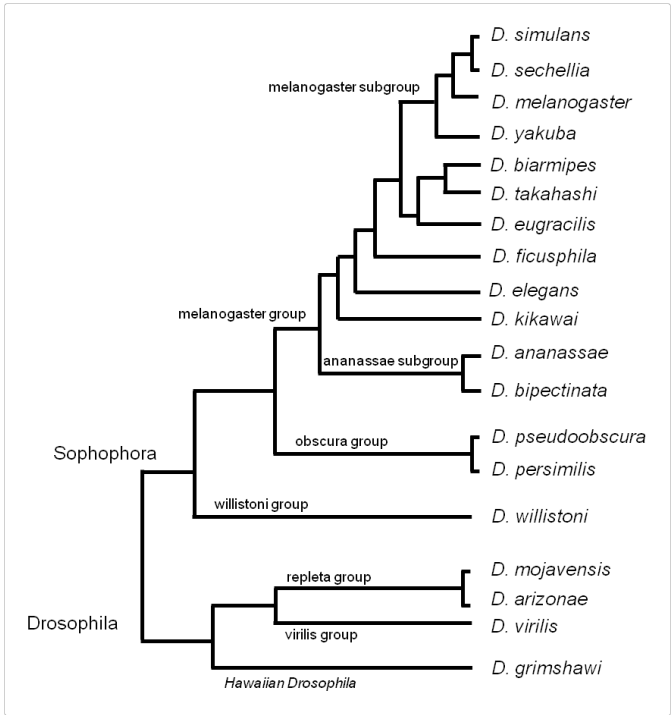

26

27 **Supplementary Fig. S3 *Drosophila* species phylogeny.**

28

29

30

31

32

33

34

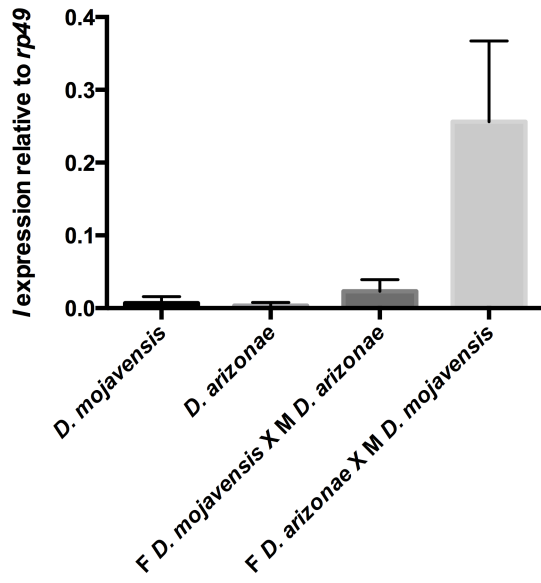

35

36 **Supplementary Fig. S4.** Expression *I*-like mRNA of testes in the second experiment..

37

38

39

40

41

42

43

44

45

46

47
